# Supplementary material for: Associations Between Albuminuria and Mortality Among US Adults by Demographic and Comorbidity Factors
Source: PubMed Central journal article supplement — J Am Heart Assoc. 2023 Oct 18;12(21):e030773. doi: 10.1161/JAHA.123.030773 (PMC10727384; doi:10.1161/jaha.123.030773), 2023-10-18
Supplement: JAH3-12-e030773-s001.pdf [file JAH3-12-e030773-s001.pdf]

# **SUPPLEMENTAL MATERIAL**

**Table S1. Associations of ACR categories with all-cause mortality according to comorbidities (2017 ACC/AHA High Blood Pressure definition), among US adults, 1999-2019.**

|                                | n      | Model 1<br>IDR (95% CI) | Model 2<br>IDR (95% CI) | Model 3<br>IDR (95% CI) | Model 4<br>IDR (95% CI) |
|--------------------------------|--------|-------------------------|-------------------------|-------------------------|-------------------------|
| <b>Neither comorbidity</b>     |        |                         |                         |                         |                         |
| <b>ACR (mg/g)</b>              |        |                         |                         |                         |                         |
| < 10                           | 14,794 | 1.00                    | 1.00                    | 1.00                    | 1.00                    |
| 10 - < 30                      | 3,581  | 1.63* (1.37, 1.95)      | 1.60* (1.35, 1.89)      | 1.51* (1.27, 1.79)      | 1.46* (1.23, 1.73)      |
| 30 - < 300                     | 1,094  | 1.99* (1.53, 2.59)      | 1.79* (1.36, 2.36)      | 1.56* (1.18, 2.06)      | 1.40* (1.05, 1.85)      |
| ≥300                           | 99     | 3.83* (1.96, 7.49)      | 3.92* (2.22, 6.93)      | 2.69* (1.44, 5.01)      | 2.50* (1.55, 4.03)      |
| <b>Hypercholesteremia only</b> |        |                         |                         |                         |                         |
| <b>ACR (mg/g)</b>              |        |                         |                         |                         |                         |
| < 10                           | 4,696  | 1.00                    | 1.00                    | 1.00                    | 1.00                    |
| 10 - < 30                      | 1,260  | 1.64* (1.28, 2.10)      | 1.52* (1.18, 1.95)      | 1.42* (1.12, 1.81)      | 1.40* (1.09, 1.79)      |
| 30 - < 300                     | 395    | 2.39* (1.76, 3.26)      | 2.25* (1.64, 3.09)      | 2.09* (1.51, 2.90)      | 1.90* (1.30, 2.77)      |
| ≥300                           | 46     | 1.66 (0.87, 3.17)       | 1.41 (0.76, 2.61)       | 1.11 (0.59, 2.07)       | 1.04 (0.54, 2.03)       |
| <b>Hypertension only</b>       |        |                         |                         |                         |                         |
| <b>ACR (mg/g)</b>              |        |                         |                         |                         |                         |
| < 10                           | 6,750  | 1.00                    | 1.00                    | 1.00                    | 1.00                    |
| 10 - < 30                      | 2,934  | 1.60* (1.42, 1.81)      | 1.51* (1.33, 1.71)      | 1.41* (1.24, 1.61)      | 1.40* (1.23, 1.60)      |
| 30 - < 300                     | 1,576  | 2.45* (2.15, 2.81)      | 2.20* (1.93, 2.50)      | 1.96* (1.72, 2.22)      | 1.80* (1.57, 2.07)      |
| ≥300                           | 326    | 4.21* (3.45, 5.14)      | 3.34* (2.73, 4.08)      | 2.96* (2.44, 3.60)      | 2.28* (1.89, 2.76)      |
| <b>Both comorbidities</b>      |        |                         |                         |                         |                         |
| <b>ACR (mg/g)</b>              |        |                         |                         |                         |                         |
| < 10                           | 6,174  | 1.00                    | 1.00                    | 1.00                    | 1.00                    |
| 10 - < 30                      | 3,408  | 1.53* (1.39, 1.68)      | 1.44* (1.31, 1.59)      | 1.40* (1.26, 1.54)      | 1.37* (1.24, 1.52)      |
| 30 - < 300                     | 1,977  | 2.66* (2.37, 2.99)      | 2.38* (2.12, 2.68)      | 2.16* (1.92, 2.42)      | 2.03* (1.80, 2.28)      |
| ≥300                           | 530    | 4.58* (3.72, 5.62)      | 4.06* (3.32, 4.96)      | 3.38* (2.73, 4.17)      | 2.60* (2.10, 3.23)      |

Abbreviations: CI: confidence interval; IDR: incidence density ratio

\*Indicates estimate is significant (p < 0.05)

<sup>a</sup> Hypertension was defined using the 2017 ACC/AHA High Blood Pressure Guideline

Model 1 is adjusted for age group, race/ethnicity, and sex

Model 2 is additionally adjusted for: Model 1 + education, income, marital status, and insurance status

Model 3 is additionally adjusted for: Model 2 + smoking, alcohol consumption, physical activity, self-rated health, and BMI

Model 4 is additionally adjusted for: Model 3 + diabetes, history of cardiovascular disease, and eGFR

**Table S2. Age adjusted cause specific mortality rates according to categories of ACR among US adults, 1999-2019.**

| <b>Cause of Death</b>        | <b>6,813<br/>total<br/>deaths</b> | <b>% of<br/>total<br/>deaths</b> | <b>IR<br/>(95% CI)<br/>Overall</b> | <b>IR<br/>(95% CI)<br/>ACR &lt;<br/>10mg/g</b> | <b>IR<br/>(95% CI)<br/>ACR 10 - &lt; 30<br/>mg/g</b> | <b>IR<br/>(95% CI)<br/>ACR 30 - &lt; 300<br/>mg/g</b> | <b>IR<br/>(95% CI)<br/>ACR ≥300<br/>mg/g</b> |
|------------------------------|-----------------------------------|----------------------------------|------------------------------------|------------------------------------------------|------------------------------------------------------|-------------------------------------------------------|----------------------------------------------|
| Diseases of the heart        | 1,760                             | 25.8                             | 3.2 (3.0, 3.4)                     | 1.9 (1.7, 2.2)                                 | 3.4 (3.0, 3.9)                                       | 6.7 (5.9, 7.7)                                        | 12.0 (9.5, 15.2)                             |
| Malignant neoplasms          | 1,532                             | 22.5                             | 2.9 (2.7, 3.1)                     | 2.4 (2.2, 2.7)                                 | 3.3 (2.9, 3.7)                                       | 4.2 (3.6, 4.8)                                        | 4.2 (2.9, 5.9)                               |
| Cerebrovascular diseases     | 374                               | 5.5                              | 0.6 (0.6, 0.7)                     | 0.4 (0.3, 0.5)                                 | 0.8 (0.6, 1.0)                                       | 1.0 (0.8, 1.4)                                        | 1.5 (1.0, 2.5)                               |
| Alzheimer's disease          | 248                               | 3.6                              | 0.5 (0.4, 0.6)                     | 0.4 (0.3, 0.5)                                 | 0.5 (0.4, 0.7)                                       | 0.6 (0.4, 0.8)                                        | 0.2 (0.1, 0.5)                               |
| Diabetes mellitus            | 237                               | 3.5                              | 0.4 (0.3, 0.5)                     | 0.2 (0.1, 0.2)                                 | 0.4 (0.3, 0.5)                                       | 1.1 (0.8, 1.5)                                        | 4.9 (3.4, 7.1)                               |
| All other causes             | 2,662                             | 39.1                             | 5.0 (4.7, 5.2)                     | 3.6 (3.3, 3.9)                                 | 5.3 (4.8, 5.9)                                       | 8.8 (7.9, 9.8)                                        | 16.9 (14.2, 20.2)                            |
| CVD/Cerebrovascular Combined | 2,134                             | 31.3                             | 3.8 (3.6, 4.1)                     | 2.4 (2.1, 2.6)                                 | 4.2 (3.8, 4.8)                                       | 7.8 (6.9, 8.8)                                        | 13.6 (10.9, 16.9)                            |

\*IR: age-adjusted mortality rate per 1,000 person-years

**Table S3. Associations of ACR categories with all-cause mortality according to presence of diabetes, obesity, CVD, and eGFR categories among US adults, 1999-2019.**

|                                       | Model 1<br>IDR (95% CI) | Model 2<br>IDR (95% CI) | Model 3<br>IDR (95% CI) | Model 4<br>IDR (95% CI) |
|---------------------------------------|-------------------------|-------------------------|-------------------------|-------------------------|
| <b>No Diabetes</b>                    |                         |                         |                         |                         |
| <b>ACR (mg/g)</b>                     |                         |                         |                         |                         |
| < 10                                  | 1.00                    | 1.00                    | 1.00                    | 1.00                    |
| 10 - < 30                             | 1.48* (1.32, 1.65)      | 1.39* (1.25, 1.55)      | 1.33* (1.19, 1.48)      | 1.27* (1.13, 1.43)      |
| 30 - < 300                            | 2.62* (2.28, 3.01)      | 2.29* (1.99, 2.63)      | 2.05* (1.79, 2.36)      | 1.80* (1.55, 2.08)      |
| ≥300                                  | 4.46* (3.56, 5.60)      | 3.69* (2.96, 4.61)      | 2.71* (2.01, 3.66)      | 2.16* (1.61, 2.88)      |
| <b>Diabetes</b>                       |                         |                         |                         |                         |
| <b>ACR (mg/g)</b>                     |                         |                         |                         |                         |
| < 10                                  | 1.00                    | 1.00                    | 1.00                    | 1.00                    |
| 10 - < 30                             | 1.45* (1.19, 1.75)      | 1.40* (1.15, 1.70)      | 1.38* (1.13, 1.68)      | 1.33* (1.08, 1.64)      |
| 30 - < 300                            | 2.51* (2.09, 3.01)      | 2.30* (1.92, 2.76)      | 2.18* (1.80, 2.65)      | 2.05* (1.70, 2.46)      |
| ≥300                                  | 4.06* (3.25, 5.06)      | 3.53* (2.81, 4.44)      | 3.19* (2.48, 4.11)      | 2.47* (1.90, 3.22)      |
| <b>BMI &lt; 30 (kg/m<sup>2</sup>)</b> |                         |                         |                         |                         |
| <b>ACR (mg/g)</b>                     |                         |                         |                         |                         |
| < 10                                  | 1.00                    | 1.00                    | 1.00                    | 1.00                    |
| 10 - < 30                             | 1.65* (1.51, 1.79)      | 1.53* (1.40, 1.66)      | 1.45* (1.33, 1.57)      | 1.38* (1.27, 1.50)      |
| 30 - < 300                            | 2.60* (2.37, 2.86)      | 2.28* (2.06, 2.52)      | 2.06* (1.86, 2.28)      | 1.85* (1.67, 2.04)      |
| ≥300                                  | 4.21* (3.54, 5.01)      | 3.56* (3.02, 4.21)      | 2.96* (2.52, 3.48)      | 2.16* (1.82, 2.56)      |
| <b>BMI ≥30 (kg/m<sup>2</sup>)</b>     |                         |                         |                         |                         |
| <b>ACR (mg/g)</b>                     |                         |                         |                         |                         |
| < 10                                  | 1.00                    | 1.00                    | 1.00                    | 1.00                    |
| 10 - < 30                             | 1.48* (1.29, 1.69)      | 1.41* (1.24, 1.60)      | 1.38* (1.22, 1.57)      | 1.36* (1.20, 1.55)      |
| 30 - < 300                            | 2.40* (2.09, 2.76)      | 2.20* (1.92, 2.52)      | 1.99* (1.74, 2.27)      | 1.80* (1.57, 2.06)      |
| ≥300                                  | 4.43* (3.56, 5.52)      | 3.76* (3.03, 4.68)      | 3.10* (2.52, 3.82)      | 2.41* (1.94, 3.00)      |
| <b>No CVD</b>                         |                         |                         |                         |                         |
| <b>ACR (mg/g)</b>                     |                         |                         |                         |                         |
| < 10                                  | 1.00                    | 1.00                    | 1.00                    | 1.00                    |
| 10 - < 30                             | 1.61* (1.48, 1.75)      | 1.51* (1.39, 1.64)      | 1.46* (1.34, 1.59)      | 1.39* (1.27, 1.51)      |
| 30 - < 300                            | 2.58* (2.35, 2.83)      | 2.32* (2.10, 2.55)      | 2.09* (1.89, 2.30)      | 1.95* (1.76, 2.16)      |
| ≥300                                  | 4.26 (3.63, 4.99)       | 3.68* (3.16, 4.29)      | 3.05* (2.63, 3.54)      | 2.44* (2.05, 2.91)      |
| <b>CVD</b>                            |                         |                         |                         |                         |
| <b>ACR (mg/g)</b>                     |                         |                         |                         |                         |
| < 10                                  | 1.00                    | 1.00                    | 1.00                    | 1.00                    |
| 10 - < 30                             | 1.54* (1.39, 1.70)      | 1.48* (1.34, 1.64)      | 1.41* (1.27, 1.57)      | 1.39* (1.24, 1.55)      |
| 30 - < 300                            | 2.22* (1.96, 2.51)      | 2.03* (1.80, 2.30)      | 1.92* (1.70, 2.16)      | 1.69* (1.49, 1.92)      |
| ≥300                                  | 3.41* (2.83, 4.11)      | 3.04* (2.51, 3.68)      | 2.71* (2.20, 3.34)      | 2.19* (1.80, 2.67)      |
| <b>eGFR ≥ 90 (mL/min)</b>             |                         |                         |                         |                         |
| <b>ACR (mg/g)</b>                     |                         |                         |                         |                         |
| < 10                                  | 1.00                    | 1.00                    | 1.00                    | 1.00                    |
| 10 - < 30                             | 1.58* (1.38, 1.81)      | 1.47* (1.29, 1.68)      | 1.38* (1.20, 1.59)      | 1.31* (1.15, 1.51)      |
| 30 - < 300                            | 2.87* (2.45, 3.36)      | 2.53* (2.15, 2.97)      | 2.21* (1.87, 2.63)      | 2.03* (1.69, 2.44)      |
| ≥300                                  | 3.99* (2.71, 5.86)      | 3.22* (2.19, 4.74)      | 2.67* (1.80, 3.97)      | 2.33* (1.57, 3.46)      |
| <b>eGFR ≥ 60 and &lt; 90 (mL/min)</b> |                         |                         |                         |                         |
| <b>ACR (mg/g)</b>                     |                         |                         |                         |                         |
| < 10                                  | 1.00                    | 1.00                    | 1.00                    | 1.00                    |
| 10 - < 30                             | 1.69* (1.53, 1.85)      | 1.58* (1.44, 1.74)      | 1.51* (1.38, 1.66)      | 1.44* (1.31, 1.58)      |
| 30 - < 300                            | 2.41* (2.13, 2.71)      | 2.15* (1.91, 2.43)      | 1.94* (1.72, 2.18)      | 1.78* (1.59, 2.00)      |
| ≥300                                  | 3.20* (2.53, 4.05)      | 2.84* (2.21, 3.64)      | 2.37* (1.84, 3.05)      | 2.13* (1.64, 2.76)      |
| <b>eGFR &lt; 60 (mL/min)</b>          |                         |                         |                         |                         |
| <b>ACR (mg/g)</b>                     |                         |                         |                         |                         |
| < 10                                  | 1.00                    | 1.00                    | 1.00                    | 1.00                    |
| 10 - < 30                             | 1.45* (1.29, 1.63)      | 1.38* (1.22, 1.56)      | 1.32* (1.17, 1.50)      | 1.30* (1.15, 1.46)      |

|            |                    |                    |                    |                    |
|------------|--------------------|--------------------|--------------------|--------------------|
| 30 - < 300 | 2.13* (1.86, 2.44) | 1.98* (1.73, 2.26) | 1.80* (1.56, 2.08) | 1.70* (1.49, 1.95) |
| ≥300       | 3.94* (3.31, 4.68) | 3.45* (2.91, 4.09) | 3.03* (2.54, 3.61) | 2.70* (2.26, 3.23) |

Abbreviations: CI: confidence interval; CVD: Cardiovascular Disease eGFR: estimated glomerular filtration rate

\*Indicates estimate is significant ( $p < 0.05$ )

\*\*Chi squared p-value statistically significant at  $< 0.05$  for DM, obesity, CVD, and eGFR

Model 1 is adjusted for age group, race/ethnicity, and sex

Model 2 is additionally adjusted for: Model 1 + education, income, marital status, and insurance status

Model 3 is additionally adjusted for: Model 2 + smoking, alcohol consumption, physical activity, self-rated health, and BMI (in obesity stratified models: BMI not adjusted for)

Model 4 is additionally adjusted for: Model 3 + comorbidities, diabetes, history of cardiovascular disease, and eGFR (in diabetes stratified models: diabetes not adjusted for; in CVD stratified models: history of CVD not adjusted for; in eGFR stratified models: eGFR not adjusted for)

**Table S4. Associations of ACR categories with all-cause mortality according to sex among US adults, 1999-2019.**

|                   | Model 1<br>IDR (95% CI) | Model 2<br>IDR (95% CI) | Model 3<br>IDR (95% CI) | Model 4<br>IDR (95% CI) |
|-------------------|-------------------------|-------------------------|-------------------------|-------------------------|
| <b>ACR (mg/g)</b> |                         |                         |                         |                         |
| <b>Men</b>        |                         |                         |                         |                         |
| <10 (reference)   | 1.00                    | 1.00                    | 1.00                    | 1.00                    |
| 10 - < 30         | 1.65* (1.49, 1.83)      | 1.53* (1.38, 1.69)      | 1.45* (1.31, 1.61)      | 1.40* (1.26, 1.55)      |
| 30 - < 300        | 2.42* (2.18, 2.68)      | 2.22* (2.00, 2.47)      | 1.97* (1.77, 2.20)      | 1.73* (1.54, 1.93)      |
| ≥300              | 3.94* (3.29, 4.72)      | 3.37* (2.84, 4.01)      | 2.70* (2.24, 3.25)      | 2.02* (1.67, 2.44)      |
| <b>Women</b>      |                         |                         |                         |                         |
| <10               | 0.70* (0.64, 0.77)      | 0.61* (0.56, 0.67)      | 0.64* (0.58, 0.70)      | 0.65* (0.59, 0.71)      |
| 10 - < 30         | 1.12* (1.02, 1.22)      | 0.93 (0.85, 1.02)       | 0.91* (0.83, 1.00)      | 0.89* (0.82, 0.98)      |
| 30 - < 300        | 1.94* (1.75, 2.16)      | 1.46* (1.30, 1.63)      | 1.37* (1.22, 1.54)      | 1.29* (1.15, 1.45)      |
| ≥300              | 3.70* (3.07, 4.47)      | 2.69* (2.20, 3.29)      | 2.42* (2.01, 2.91)      | 1.82* (1.51, 2.21)      |

\*Indicates estimate is significant ( $p < 0.05$ )

Abbreviations: CI: confidence interval; IDR: incidence density ratio

Model 1 is adjusted for age group, and race/ethnicity

Model 2 is additionally adjusted for: Model 1 + education, income, marital status, and insurance status

Model 3 is additionally adjusted for: Model 2 + smoking, alcohol consumption, physical activity, self-rated health, and BMI

Model 4 is additionally adjusted for: Model 3 + diabetes, history of cardiovascular disease, comorbidities and eGFR

**Table S5. Associations of ACR categories with all-cause mortality according to comorbidities among US adults, 1999-2019.**

|                                | Model 1<br>IDR (95% CI) | Model 2<br>IDR (95% CI) | Model 3<br>IDR (95% CI) |
|--------------------------------|-------------------------|-------------------------|-------------------------|
| <b>ACR (mg/g)</b>              |                         |                         |                         |
| <b>Neither comorbidity</b>     |                         |                         |                         |
| < 10 (reference)               | 1.00                    | 1.00                    | 1.00                    |
| 10 - < 30                      | 1.68* (1.44, 1.96)      | 1.63* (1.40, 1.91)      | 1.54* (1.32, 1.80)      |
| 30 - < 300                     | 2.37* (1.94, 2.90)      | 2.13* (1.74, 2.59)      | 1.82* (1.49, 2.22)      |
| ≥300                           | 4.90* (3.12, 7.69)      | 4.56* (3.10, 6.70)      | 3.16* (2.05, 4.87)      |
| <b>Hypercholesteremia only</b> |                         |                         |                         |
| < 10                           | 0.97 (0.84, 1.12)       | 1.00 (0.87, 1.16)       | 0.97 (0.84, 1.12)       |
| 10 - < 30                      | 1.51* (1.27, 1.78)      | 1.49* (1.26, 1.76)      | 1.37* (1.17, 1.61)      |
| 30 - < 300                     | 1.97* (1.52, 2.55)      | 1.89* (1.46, 2.44)      | 1.65* (1.26, 2.16)      |
| ≥300                           | 2.02* (1.10, 3.73)      | 1.74 (0.94, 3.21)       | 1.47 (0.81, 2.67)       |
| <b>Hypertension only</b>       |                         |                         |                         |
| < 10                           | 1.47* (1.29, 1.67)      | 1.42* (1.25, 1.62)      | 1.40* (1.22, 1.59)      |
| 10 - < 30                      | 2.33* (2.01, 2.70)      | 2.12* (1.83, 2.46)      | 1.93* (1.67, 2.22)      |
| 30 - < 300                     | 3.49* (3.07, 3.98)      | 3.07* (2.70, 3.50)      | 2.69* (2.35, 3.08)      |
| ≥300                           | 5.86* (4.70, 7.32)      | 4.53* (3.57, 5.73)      | 3.94* (3.13, 4.96)      |
| <b>Both comorbidities</b>      |                         |                         |                         |
| < 10                           | 1.27* (1.12, 1.42)      | 1.26* (1.12, 1.42)      | 1.17* (1.04, 1.32)      |
| 10 - < 30                      | 1.88* (1.64, 2.16)      | 1.73* (1.51, 1.99)      | 1.57* (1.37, 1.80)      |
| 30 - < 300                     | 3.31* (2.91, 3.76)      | 2.89* (2.54, 3.29)      | 2.51* (2.19, 2.87)      |
| ≥300                           | 5.35* (4.32, 6.62)      | 4.68* (3.80, 5.77)      | 3.65* (2.93, 4.54)      |

\*Indicates estimate is significant ( $p < 0.05$ )

Model 1 is adjusted for age group, race/ethnicity, and sex

Model 2 is additionally adjusted for: Model 1 + education, income, marital status, and insurance status

Model 3 is additionally adjusted for: Model 2 + smoking, alcohol consumption, physical activity, self-rated health, and BMI

**Figure S1. Cohort Inclusion and Exclusion Flow Chart.**

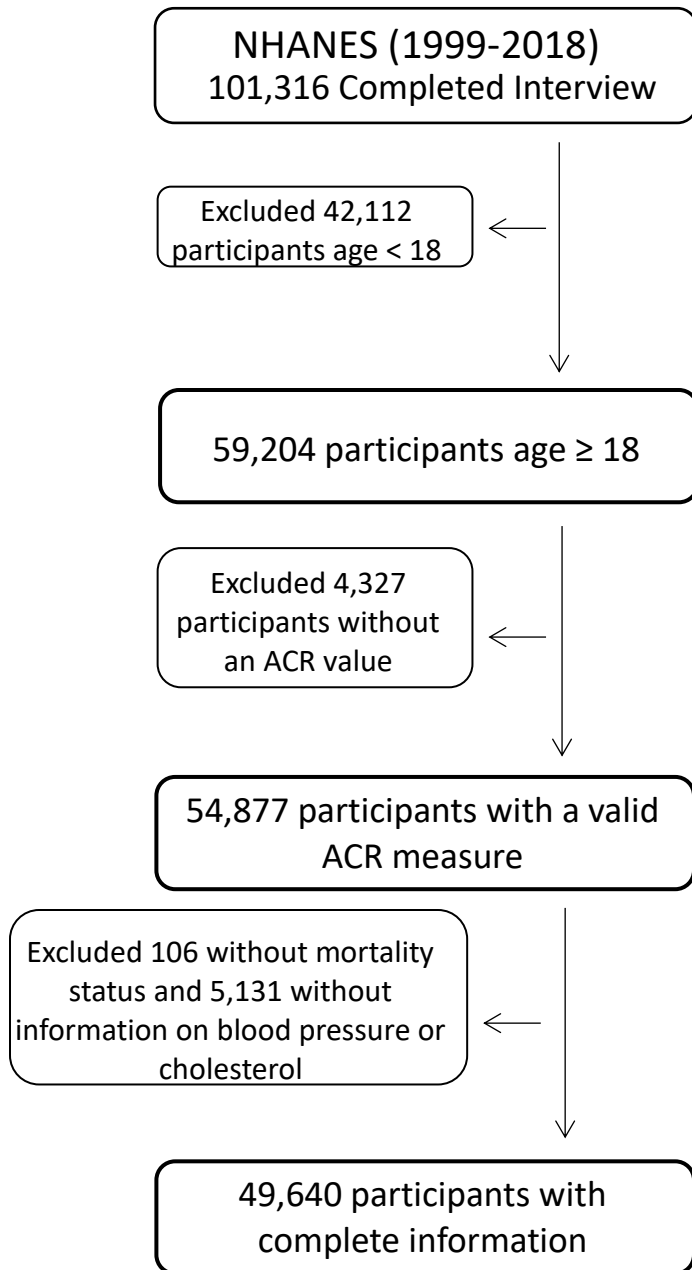



**Figure S2. Age-adjusted mortality rate according to category of albuminuria among US adults, 1999-2019.**

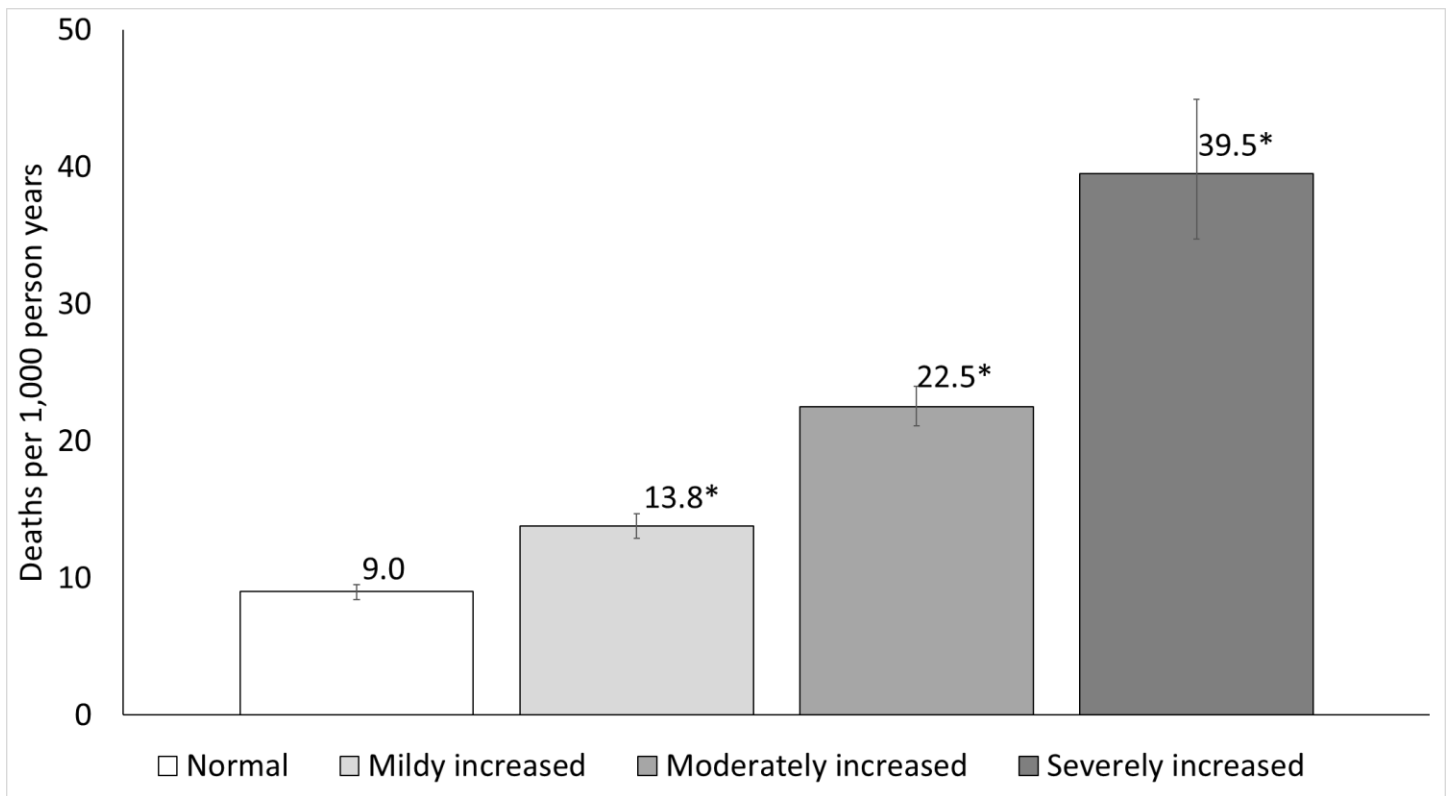

\*Chi squared p-value indicates statistically different at < 0.05 for ACR category (ref: Normal)
